# High prevalence of laminopathies among patients with metabolic syndrome

Anne Dutour<sup>1,3,†</sup>, Patrice Roll<sup>2,5,†</sup>, Bénédicte Gaborit<sup>1,3</sup>, Sébastien Courrier<sup>2</sup>, Marie-Christine Alessi<sup>1,6</sup>, David-Alexandre Tregouet<sup>8</sup>, Fabien Angelis<sup>2</sup>, Andrée Robaglia-Schlupp<sup>2,5</sup>, Nathalie Lesavre<sup>4</sup>, Pierre Cau<sup>2,5</sup>, Nicolas Lévy<sup>2,7</sup>, Catherine Badens<sup>2,7,†</sup> and Pierre-Emmanuel Morange<sup>1,6,\*,†</sup>

<sup>1</sup>INSERM UMR\_S626 and <sup>2</sup>INSERM UMR\_S910, Université de la Méditerranée, Marseille, France, <sup>3</sup>Service d'Endocrinologie and <sup>4</sup>Centre d'Investigation Clinique, Hôpital Nord, Marseille, France <sup>5</sup>Laboratoire de Biologie Cellulaire, Hôpital d'enfants de la Timone, Marseille, France, <sup>6</sup>Laboratoire d'Hématologie and <sup>7</sup>Laboratoire de Génétique Moléculaire, Hôpital de la Timone, Marseille, France and <sup>8</sup>INSERM UMR\_S937, ICAN Institute: Université Pierre et Marie Curie, Paris, France

Received June 9, 2011; Revised and Accepted June 24, 2011

**Constitutional laminopathies, such as the Dunnigan familial partial lipodystrophy, are severe diseases caused by mutations in A-type lamins and share several features with metabolic syndrome (MS). In this study, we hypothesized that MS may be, in some cases, a mild form of laminopathies and use the abnormal cell nucleus phenotype observed in these diseases as a primary screening test in patients suffering from common MS.**

Nuclear shape and lamin A nucleoplasmic distribution abnormalities were systematically searched in lymphoblastoid cells of 87 consecutive patients with MS. In parallel, five genes encoding either the A-type lamins or the enzymes of the lamin A maturation pathway were systematically sequenced (*LMNA*, *ZMPSTE24*, *ICMT*, *FNTA* and *FNTB*). We identified 10 MS patients presenting abnormal nuclear shape and disturbed lamin A/C nuclear distribution. These patients were not clinically different from those without nuclear abnormalities except that they were younger, and had higher triglyceridemia and SGPT levels. Three of them carry a heterozygous mutation in *LMNA* or in *ZMPSTE24*, a gene encoding one of the lamin A processing enzymes. All three mutations are novel missense mutations predicted to be damaging. Both lymphoblastoid cells and skin fibroblasts from the patient carrying the mutation in *ZMPSTE24*, showed accumulation of lamin A precursor, indicating an alteration of the lamin A processing, confirmed by functional study.

Together, these results show for the first time, that a significant proportion of MS patients exhibits laminopathies and suggest that systematic investigation of lamin A and its partners should be performed at the diagnosis of this syndrome.

## INTRODUCTION

The metabolic syndrome (MS) is a cluster of metabolic abnormalities affecting 30% of North Americans and 23% of Europeans (1,2). These abnormalities include abdominal adiposity, impaired fasting glucose and hyper-insulinemia both reflecting insulin resistance, dyslipidemia, hepatic steatosis and high blood pressure (1). Interestingly, MS-associated features such as insulin resistance and dyslipidemia are also

frequently observed in monogenic disorders such as the Dunnigan familial partial lipodystrophy (FPLD) (3,4), suggesting that such inherited disorders could provide important insights for understanding typical MS.

FPLD belongs to laminopathies, a large group of human diseases due to mutations in genes encoding the nuclear lamins and associated proteins (5). A-type lamins form a nucleoplasmic network of structural proteins, the nuclear matrix; they are also localized at the inner surface of the nuclear envelope

\*To whom correspondence should be addressed at: Laboratory of Haematology, CHU Timone, 246, rue Saint-Pierre, 13385 Marseille Cedex 05, France. Tel: +33 491386049; Fax: +33 491942332; Email: pmorange@ap-hm.fr

†These authors contributed equally to this work.

where they form the nuclear *lamina* together with other proteins such as B-type lamins or nucleoplasmic domain of some nuclear envelop proteins. Lamins have multiple functions, including the maintenance of the nuclear structure and shape, heterochromatin organization and regulation of gene transcription (6).

A-type lamins, lamin A and C, are both encoded by *LMNA* but differ from each other because of an alternative splice site in *LMNA* exon 10. Lamin C is produced directly in its mature form, whereas lamin A is first produced as a precursor, the pre-lamin A, which then undergoes a series of four post-translational modifications (4). To generate mature lamin A protein, pre-lamin A is first farnesylated by the farnesyl-transferase, a heterodimer enzyme encoded by the *FNTA* and *FNTB* genes, then cleaved either by the zinc metalloprotease ZMPSTE24 or by RCE1. The following steps include a carboxy-methylation by the isoprenyl-cysteine carboxyl methyltransferase (encoded by *ICMT*) and a second cleavage by the zinc metalloprotease ZMPSTE24. In humans, genetic variants in *ZMPSTE24* are known to cause two different laminopathies (i.e. Mandibuloacral dysplasia, MAD and Restrictive Dermopathy) (7,8), while *ZMPSTE24*-null mice exhibit decreased blood glucose and insulin concentrations as well as an altered lipid metabolism (9). There has been considerable interest in the association between common *LMNA* single nucleotide polymorphisms (SNPs) and components of the MS with conflicting results reported, some of them suggesting modest positive associations, whereas others, based on studies with larger sample size, did not demonstrate any convincing evidence for an effect of *LMNA* SNPs on risk for type 2 diabetes mellitus or MS (10–21). However, it is not known whether rare DNA sequence variants of *LMNA* or of the four other genes encoding enzymes involved in lamin A maturation collectively contribute to common MS.

In this study, we hypothesized that MS may represent in some cases, a mild form of laminopathy and used the cell nucleus phenotype observed in several of these diseases (22) as a screening test in patients suffering from common MS. For this purpose, 100 consecutive patients with MS were systematically enrolled for clinical data collection, and 87 were investigated for nuclear shape abnormalities and lamin A nucleoplasmic distribution. Concomitantly, *LMNA* and four other genes encoding proteins involved in the lamin A maturation pathway were investigated by direct sequencing.

## RESULTS

### Cell studies

Among the 100 patients enrolled in the study, 87 were available for cell investigations.

Out of these 87 patients, 10 (11.5%) harbored the two selection criteria for abnormal nuclear phenotype (Tables 1 and 2). Only one patient harbored just one criterion (24% of dysmorphic nuclei) but as there was no lamin A/C staining abnormalities, he was classified as having a normal phenotype. Interestingly, two of the 10 patients with abnormal phenotype were siblings. In order to confirm these abnormalities on another cell type, we analyzed the cellular phenotype in cultured dermal fibroblasts which were available for seven of the 10 patients with

abnormalities. We confirmed the abnormal phenotype identified in lymphoblastoid cells for all seven with a high rate of dysmorphic nuclei (mean 30%) and an abnormal lamin A/C staining (reduced signal, heterogeneous staining with aggregates). Blebbing nuclei were frequent and associated with the reduction or the absence of lamin B1 staining in blebs (Fig. 1). For five of the 10 patients, the nuclear pattern of NuMA (Nuclear Mitotic Apparatus) protein was abnormal with a heterogeneous staining that could reflect a profound nuclear matrix defect (Supplementary Material, Fig. S1). Four of the 10 patients with abnormalities exhibited significant reduction (15–56%) of lamin A expression on western blot analyses. Prelamin A was undetectable for all patients, except for patient 23. This patient showed 47% of his cells positive for pre-lamin A by immunofluorescence (IF) with quite a low and heterogeneous intensity staining which could explain the absence of detection by western blot technique.

### Clinical and biological features of the MS from patients with nuclear abnormalities

The clinical and biological characteristics of the 10 patients with nuclear abnormalities are summarized in Tables 1 and 2. In summary, four patients (patients 12, 23, 45, 67) had a very severe metabolic phenotype either because of insulin resistance or cardiac disease. Noticeably, patient 9 was enrolled after a loss of 40 kg following bariatric surgery and presented a normalization of glycemia at the time of cell phenotyping.

Patients with nuclear abnormalities ( $n = 10$ ) tended to be younger than patients without nuclear abnormalities ( $n = 77$ ) (Table 1). No anthropometrical difference was evidenced between the two groups [particularly no difference in BMI, waist circumference (WC), WC/BMI] except for thigh circumference (TC), which was slightly higher in patients with nuclear abnormalities. The frequency of diabetes was no different in both groups but the age at diagnosis tended to be lower in the group with nuclear abnormalities. No difference was evidenced in the frequency of treatment with statins or in the number of MS criteria ( $4.4 \pm 0.27$  versus  $4.09 \pm 0.09$ ,  $P = 0.25$ ). Interestingly, the group with nuclear abnormalities tended to have higher levels of triglycerides ( $3.39 \pm 0.89$  versus  $2.14 \pm 0.16$  mmol/l,  $P = 0.03$ ) and of alanine aminotransferase (ALT) ( $66 \pm 20$  versus  $43.1 \pm 2.8$  UI/l,  $P = 0.03$ ) than the group without.

### Molecular studies

Molecular studies were performed for all 100 patients. In the group of patients with nuclear abnormalities, direct sequencing of the five genes revealed two new heterozygous missense mutations in *LMNA*: the first one (patient 15), in position c.1232 G > A, resulted in a Glycine to Aspartate exchange in amino acid 411 which is located in the chromatin binding domain of both lamin A and lamin C, upstream and near to nuclear localization signal (NLS) localized at amino acids 417–422 (Fig. 2). The second single-nucleotide substitution (patient 45), c.1893G > A, changed the amino acid Glycine into Aspartate at position 631, located in the C-terminal domain specific of lamin A (Fig. 2).

In the same group, a third new heterozygous missense mutation was characterized in *ZMPSTE24* for patient 23 in

**Table 1.** Main characteristics of the 100 patients with metabolic syndrome included in the cohort

|                                                           | Total population, <i>n</i> = 100 <sup>a</sup> | Patients without nuclear abnormality, <i>n</i> = 77 | Patients with nuclear abnormalities, <i>n</i> = 10 | <i>P</i> -value |
|-----------------------------------------------------------|-----------------------------------------------|-----------------------------------------------------|----------------------------------------------------|-----------------|
| Age (years)                                               | 56 ± 0.9                                      | 56.6 ± 1.0                                          | 50.2 ± 3.3                                         | <b>0.03</b>     |
| BMI (kg/m <sup>2</sup> )                                  | 37.1 ± 0.7                                    | 36.6 ± 0.8                                          | 39.1 ± 1.2                                         | 0.28            |
| WC (cm)                                                   | 119.8 ± 1.4                                   | 118.8 ± 1.5                                         | 125 ± 2                                            | 0.16            |
| TC (cm)                                                   | 55.5 ± 0.6                                    | 54.8 ± 0.7                                          | 59 ± 1.3                                           | <b>0.04</b>     |
| Fat mass (%)                                              | 39.4 ± 0.7                                    | 38.8 ± 0.7                                          | 40 ± 3                                             | 0.3             |
| WC/TC                                                     | 2.16 ± 0.02                                   | 2.17 ± 0.02                                         | 2.13 ± 0.06                                        | 0.3             |
| TC/BMI                                                    | 1.52 ± 0.02                                   | 1.53 ± 0.02                                         | 1.51 ± 0.02                                        | 0.7             |
| Frequency of diabetes ( <i>n</i> , %)                     | 82 (82)                                       | 62, 81                                              | 9, 90                                              | 0.49            |
| Frequency of hypertension ( <i>n</i> , %)                 | 80 (80)                                       | 59, 77                                              | 9, 90                                              | 0.45            |
| Frequency of statin TRT ( <i>n</i> , %)                   | 60 (60)                                       | 48, 62                                              | 6, 60                                              | 0.9             |
| Number of criteria of MS                                  | 4.12 ± 0.009                                  | 4.09 ± 0.09                                         | 4.4 ± 0.27                                         | 0.25            |
| HDL cholesterol (mmol/l)                                  | 1.09 ± 0.04                                   | 1.12 ± 0.04                                         | 0.97 ± 0.13                                        | 0.3             |
| Triglycerides (mmol/l)                                    | 2.23 ± 0.17                                   | 2.14 ± 0.16                                         | 3.39 ± 0.89                                        | <b>0.03</b>     |
| Alanine aminotransferase (UI/l)                           | 46.86 ± 3.9                                   | 43.1 ± 2.8                                          | 66 ± 20                                            | <b>0.03</b>     |
| Gamma glutamyl transpeptidase (UI/l)                      | 70.34 ± 9.71                                  | 63.9 ± 8.5                                          | 100 ± 43                                           | 0.2             |
| Slight lipodystrophy (of lower limb) ( <i>n</i> , %)      | 4 (4)                                         | (2) (2.6)                                           | 2 (20)                                             | <b>0.006</b>    |
| Muscular complaint ( <i>n</i> , %)                        | 4 (4)                                         | (2) (2.6)                                           | 2 (20)                                             | <b>0.006</b>    |
| Cardiac rhythm abnormalities ( <i>n</i> , %) <sup>b</sup> | 3 (3)                                         | (2) (2.6)                                           | 1 (10)                                             | 0.31            |

Bold values indicate *P*-value < 0.05.

MS, metabolic syndrome as assessed by NCEP-ATPIII; WC, waist circumference; TC, thigh circumference.

Quantitative variables are expressed as mean ± SD and qualitative variables as number with percentage.

*P* for comparison between patients with and without nuclear abnormalities.

<sup>a</sup>Among the 100 patients enrolled in the study, 87 were available for cellular investigations.

<sup>b</sup>Cardiac rhythm abnormalities due to coronaropathy were excluded from this analysis.

position c.1312 C > T and leads to a Leucine to Phenylalanine substitution in position 438 at the protein level (Fig. 2). Interestingly, this patient was the only one to harbor prelamina A accumulation in fibroblast cells. ZMPSTE24 protein expression was not reduced in this patient compared with wild-type control (Fig. 1C). Moreover, study of the prelamina A processing by an ELISA approach revealed a significant reduction (more than 50%) of mature lamin A production for this patient compared with control (Fig. 3).

None of the three identified mutations were present in a population of 120 unrelated control individuals. Transcripts sequencing showed the presence of both mutated and non-mutated alleles indicating that the mutant alleles are expressed. Family study was not possible for any of the mutated patients because their parents were not available.

No missense or splice sites variation or copy-number variations (CNV) in the five genes was identified in the seven remaining patients with nuclear defects.

In the group of the 77 patients without nuclear defects and in the group of 13 patients not tested for these nuclear abnormalities, no missense or splice sites variation was identified either in *LMNA* or in *ZMPSTE24*; regarding the three other tested genes, two missense mutations in heterozygous condition were detected in *FNTA*: p.P27L and p.T375A. However, as these variations were not associated with nuclear defects, they have not been considered as lamin altering mutations for the time being.

Expression studies on lymphoblastoid cells were conducted in two subgroups of seven patients with and eight without the nuclear defects, both groups being matched for age and sex. No significant differences were noted between the two groups either in the levels of lamin A/C transcripts

expression or in the protein levels (Supplementary Material, Fig. S2).

## DISCUSSION

The past decade has seen the emergence of links between the nuclear envelope and several diseases (23). Undoubtedly, is the identification of more than 10 different diseases resulting from mutations within *LMNA* along with a further seven diseases or anomalies due to defects in other lamin-associated nuclear envelope proteins that has revitalized interest in these proteins. Our study is the first to systematically assess typical features of laminopathies such as nuclear shape abnormalities in a cohort of individuals with MS. Following this approach, 10 patients (about 11%) displayed abnormalities of the nuclear shape and lamin A/C nuclear distribution. Moreover, these patients also presented a reduction or the absence of lamin B1 staining in blebs which is another typical feature seen in laminopathies (9,24). To avoid a possible effect due to cell transformation in lymphoblastoid cells (i.e. overestimation of nuclear abnormalities), we analysed skin fibroblasts for seven out of the 10 patients and confirmed the results in all cases.

Three of the 10 individuals with anomalies of nuclear envelope had functionally significant sequence variations in *LMNA* or *ZMPSTE24*. It has been already observed that *LMNA* mutations may be characterized in individuals referred for lipodystrophy and/or android adiposity, insulin resistance or altered glucose tolerance (25) but to our knowledge, we provide here the first study describing the prevalence of laminopathy in MS. In our cohort of patients with

**Table 2.** Clinical, molecular and cell characteristics of the 10 patients with nuclear abnormalities

| Patient 9                                                       | Patient 10                                     | Patient 12 <sup>a</sup>                                                                                                                               | Patient 15                                                                                                          | Patient 17                                                                                                            | Patient 23                                                                                                                      | Patient 35 <sup>a</sup>                                                                                                                                      | Patient 45                                                                                                                                                         | Patient 62                                                   | Patient 67                                                                                               |
|-----------------------------------------------------------------|------------------------------------------------|-------------------------------------------------------------------------------------------------------------------------------------------------------|---------------------------------------------------------------------------------------------------------------------|-----------------------------------------------------------------------------------------------------------------------|---------------------------------------------------------------------------------------------------------------------------------|--------------------------------------------------------------------------------------------------------------------------------------------------------------|--------------------------------------------------------------------------------------------------------------------------------------------------------------------|--------------------------------------------------------------|----------------------------------------------------------------------------------------------------------|
| Main clinical features                                          |                                                |                                                                                                                                                       |                                                                                                                     |                                                                                                                       |                                                                                                                                 |                                                                                                                                                              |                                                                                                                                                                    |                                                              |                                                                                                          |
| Women, 37 years,<br>BMI = 40.1<br>Diabetes at 35                | Women, 68 years,<br>BMI = 46.6,<br>No diabetes | Women, 50 years,<br>BMI = 41.5<br>Diabetes at 37<br>Insulin resistance<br><br>(2.23UI/kg/day)<br><br>Fatty liver<br><br>HyperTG<br>Slight lipoatrophy | Men, 48 years,<br>BMI = 36.5<br>Diabetes at 48<br>Fatty liver<br><br>HyperTG<br><br>Referred for<br>hyperthyroidism | Men, 49 years,<br>BMI = 32.7<br>Diabetes at 30<br>Fatty liver<br><br>Severe hyperTG<br><br>Neuromuscular<br>complaint | Men, 43 years,<br>BMI = 41<br>Diabetes at 39<br>Dilated<br>cardiomyopathy<br><br>(LVEF = 25%)<br><br>Fatty liver<br><br>HyperTG | Men, 51 years,<br>BMI = 37.4<br>Diabetes at 47<br>HyperTG<br><br>Post-intensive care<br>muscular<br>weakness<br>Kidney neoplasm<br>(death 6 months<br>later) | Women, 44 years,<br>BMI = 37.1<br>Diabetes at 26,<br>Insulin resistance (2UI/<br>kg/day)<br><br>CAD<br><br>Severe hyperTG<br><br>Fatty liver<br>Slight lipoatrophy | Women, 70 years,<br>BMI = 39.3<br>Diabetes at 40,<br>hyperTG | Men, 47 years,<br>BMI = 38<br>Diabetes at 37<br>Sudden death on<br>ventricular<br>arrhythmia<br>Myalgias |
| Molecular defects                                               |                                                |                                                                                                                                                       |                                                                                                                     |                                                                                                                       |                                                                                                                                 |                                                                                                                                                              |                                                                                                                                                                    |                                                              |                                                                                                          |
| NI                                                              | NI                                             | NI                                                                                                                                                    | <i>LMNA</i> exon 7<br>Heterozygous;<br>p.G411D,<br>C-terminal domain                                                | NI                                                                                                                    | <i>ZMPSTE24</i> exon 10<br>Heterozygous;<br>p.L438F,<br>C-terminal domain                                                       | NI                                                                                                                                                           | <i>LMNA</i> exon 11<br>Heterozygous;<br>p.G631D,<br>C-terminal domain                                                                                              | NI                                                           | NI                                                                                                       |
| Immunofluorescence                                              |                                                |                                                                                                                                                       |                                                                                                                     |                                                                                                                       |                                                                                                                                 |                                                                                                                                                              |                                                                                                                                                                    |                                                              |                                                                                                          |
| Dysmorphic nuclei (types of abnormalities), %                   |                                                |                                                                                                                                                       |                                                                                                                     |                                                                                                                       |                                                                                                                                 |                                                                                                                                                              |                                                                                                                                                                    |                                                              |                                                                                                          |
| LC : 40<br>F : 47<br>(L, B)                                     | LC : 52<br>F : 23<br>(B)                       | LC : 30<br>F : NA<br>(B)                                                                                                                              | LC : 32<br>F : NA<br>(L, B)                                                                                         | LC : 50<br>F : 24<br>(B)                                                                                              | LC : 37<br>F : 28<br>(L, B)                                                                                                     | LC : 26<br>F : NA<br>(B)                                                                                                                                     | LC : 29<br>F : 38<br>(L, B)                                                                                                                                        | LC : 31<br>F : 17<br>(L, B, M)                               | LC : 32<br>F : 31<br>(L, B, M)                                                                           |
| Lamin A/C staining                                              |                                                |                                                                                                                                                       |                                                                                                                     |                                                                                                                       |                                                                                                                                 |                                                                                                                                                              |                                                                                                                                                                    |                                                              |                                                                                                          |
| Heterogeneous with polar clustering of staining (40% of nuclei) |                                                |                                                                                                                                                       |                                                                                                                     |                                                                                                                       |                                                                                                                                 |                                                                                                                                                              |                                                                                                                                                                    |                                                              |                                                                                                          |
| Prelamin A staining                                             |                                                |                                                                                                                                                       |                                                                                                                     |                                                                                                                       |                                                                                                                                 |                                                                                                                                                              |                                                                                                                                                                    |                                                              |                                                                                                          |
| Absent                                                          |                                                |                                                                                                                                                       |                                                                                                                     |                                                                                                                       |                                                                                                                                 |                                                                                                                                                              |                                                                                                                                                                    |                                                              |                                                                                                          |
| Lamin B1 staining                                               |                                                |                                                                                                                                                       |                                                                                                                     |                                                                                                                       |                                                                                                                                 |                                                                                                                                                              |                                                                                                                                                                    |                                                              |                                                                                                          |
| Absent in blebs                                                 |                                                |                                                                                                                                                       |                                                                                                                     |                                                                                                                       |                                                                                                                                 |                                                                                                                                                              |                                                                                                                                                                    |                                                              |                                                                                                          |
| NuMA staining                                                   |                                                |                                                                                                                                                       |                                                                                                                     |                                                                                                                       |                                                                                                                                 |                                                                                                                                                              |                                                                                                                                                                    |                                                              |                                                                                                          |
| Heterogeneous                                                   |                                                |                                                                                                                                                       |                                                                                                                     |                                                                                                                       |                                                                                                                                 |                                                                                                                                                              |                                                                                                                                                                    |                                                              |                                                                                                          |
| Western blot (expression versus control)                        |                                                |                                                                                                                                                       |                                                                                                                     |                                                                                                                       |                                                                                                                                 |                                                                                                                                                              |                                                                                                                                                                    |                                                              |                                                                                                          |
| Lamin A/C                                                       |                                                |                                                                                                                                                       |                                                                                                                     |                                                                                                                       |                                                                                                                                 |                                                                                                                                                              |                                                                                                                                                                    |                                                              |                                                                                                          |
| Reduction of 38% for Lamin A                                    |                                                |                                                                                                                                                       |                                                                                                                     |                                                                                                                       |                                                                                                                                 |                                                                                                                                                              |                                                                                                                                                                    |                                                              |                                                                                                          |
| Prelamin A                                                      |                                                |                                                                                                                                                       |                                                                                                                     |                                                                                                                       |                                                                                                                                 |                                                                                                                                                              |                                                                                                                                                                    |                                                              |                                                                                                          |
| Absent                                                          |                                                |                                                                                                                                                       |                                                                                                                     |                                                                                                                       |                                                                                                                                 |                                                                                                                                                              |                                                                                                                                                                    |                                                              |                                                                                                          |

CAD, coronary artery disease; NI, no mutation identified; NA, not available; ND, not done; hyperTG, hyperTriGlyceridemia; LC, lymphoblastoid cells; F, fibroblasts; LVEF, left ventricular ejection fraction; L, lobulation; B, blebs; M, micronuclei.

<sup>a</sup>Related patients.

<sup>b</sup>Studies realized on lymphoblastoid cells.

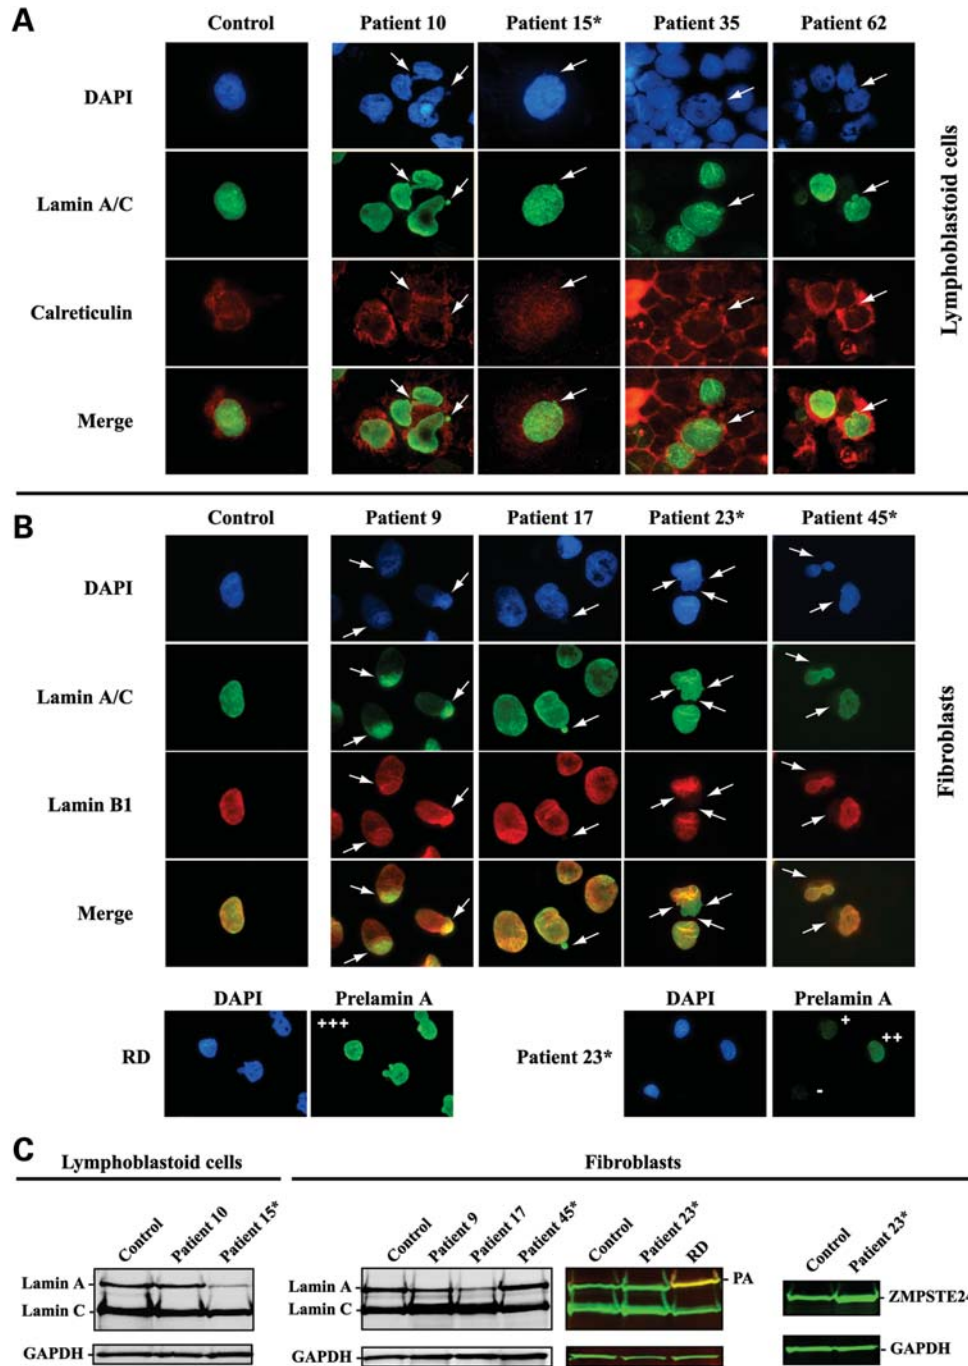

**Figure 1.** Immunofluorescence and western blot analysis from different patients and controls. (A) Lymphoblastoid cells from a non-obese, non-diabetic control (aged 36 years) and four different patients (10, 15, 35 and 62). Lamin A/C and calreticulin were detected with specific antibodies and nuclei were counterstained with DAPI. (B) Cultured skin fibroblasts from a non-obese, non-diabetic control (aged 42 years) and four different patients (9, 17, 23 and 45). Lamin A/C, lamin B1 and prelamin A (for patient 23) were detected with specific antibodies and nuclei were counterstained with DAPI. Arrows indicate some of nuclear shape or protein staining abnormalities observed in patients but not in control cells. Asterisk indicates patients with *LMNA* or *ZMPSTE24* mutations. (Minus) indicates negative staining and (plus) low, (double plus) medium or (triple plus) high staining. (C) Western blot analysis of nuclear matrix proteins for lymphoblastoid cells (patients 10 and 15 versus a non-obese, non-diabetic control) and total proteins from fibroblasts (patients 9, 17 and 45 versus a non-obese, non-diabetic control). For fluorescent western blot, yellow signal indicates the presence of prelamin A protein, as the result of binding of anti-lamin A/C antibody (green signal) and anti-prelamin A antibody (red signal).

MS, genetic mutations affecting A-type lamins or *ZMPSTE24* are far from being uncommon, with a prevalence of 3%. None of these three mutations was detected in a group of 120 healthy controls, nor was reported in

the 1000 Genomes Project database (<http://www.ncbi.nlm.nih.gov/projects>).

Until now, mutations in *ZMPSTE24* have been shown to be responsible for Restrictive Dermopathy and MAD. This last

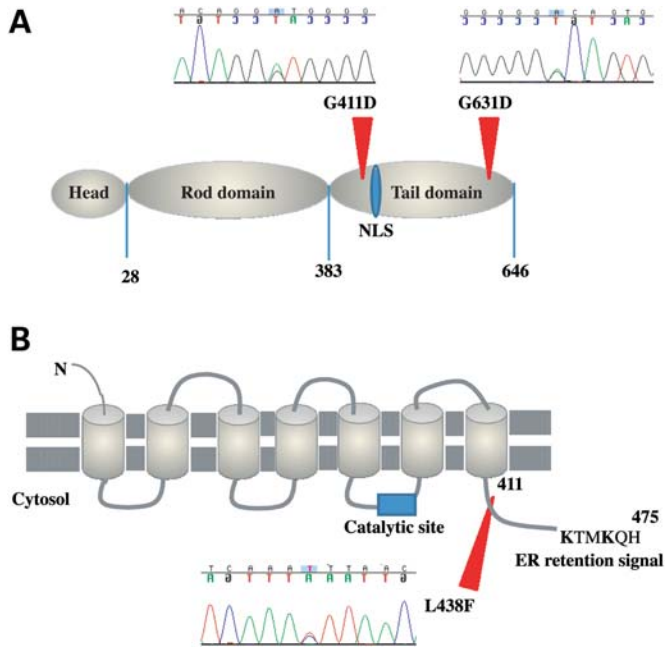

**Figure 2.** Models of protein structures for (A) Lamin A and (B) ZMPSTE24 and locations of the mutated residues (red arrows). Numbers represent AA residues. Experimental nucleotide sequences are shown for each variant.

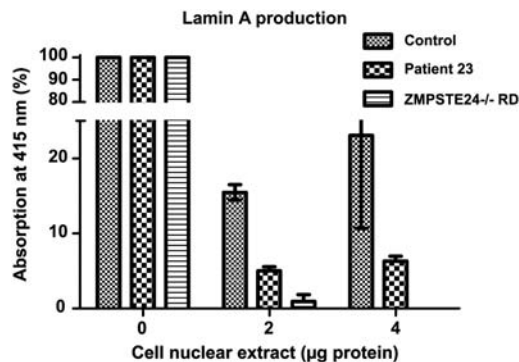

**Figure 3.** Study of the Prelamin A processing on fibroblasts from patient 23 harboring ZMPSTE24 p.L438F mutation compared with wild-type control and ZMPSTE24<sup>-/-</sup> RD subjects. A condition with 0 µg of cell nuclear extract was used as blank (0). Two protein concentrations of cell nuclear extracts (2 and 4 µg) were tested. Lamin A production has been calculated by the difference between relative absorption observed with lamin A and prelamin A antibodies. Lamin A production is expressed as percentage normalized with sample containing no nuclear extract, referred as 100%. Each test was realized in triplicate and data were confirmed in two independent experiments. Data are mean ± SD.

syndrome associates insulin resistance, high risk for cardiovascular disease and lipodystrophy in patients with homozygous or compound heterozygous mutations. For the first time, we identified a heterozygous mutation in ZMPSTE24 in an individual with MS. Bioinformatic prediction of the mutation consequences using the algorithm proposed on Polyphen site (<http://genetics.bwh.harvard.edu/pph/>) suggested a probably damaging effect. The substitution replaces an aliphatic AA by an aromatic and concerns a residue strongly conserved

among species. This mutation does not cause a reduction in protein expression but probably reduces the enzymatic activity of ZMPSTE24 which is not totally compensated by the normal allele, as evidenced by the alteration of the prelamin A processing and nuclear prelamin A accumulation. The p.G411D lamin A mutation leads to the reduction of lamin A and C expression but seems to have no effect in the nuclear localization of the protein despite the vicinity of NLS. No functionally significant variations of the five sequenced genes were observed in the seven remaining individuals with nuclear abnormalities but the fact that two of these seven individuals are relatives is in favor of a constitutional cause for these abnormalities. In an attempt to go further in the characterization of molecular basis for nuclear abnormalities in this subgroup of seven patients, we screened also RCE1. This gene was not included initially in the design of the study given that the Ras Converting Enzyme, even if being responsible of the first cleavage of prelamin A, is not lamin A specific but is also involved in proteolytic processing of other farnesylated proteins, including Ras. Again, no variation of any kind was detected after direct sequencing. Because our selection criteria included nuclear lamin A distribution, we suggest that these seven individuals presented a nuclear envelope or nucleoplasm-related disorders, involving a partner of lamins not investigated in this study such as Emerin (26) or Nesprin-1 and -2 (27) or a yet unknown partner. In these seven individuals, sequencing of other genes involved in nuclear envelope integrity is underway to find other functional variants that may be responsible for the nuclear abnormalities observed.

We evidenced no relationship between the clinical and biological characteristics of the patients and the presence of a laminopathy. Individuals with nuclear abnormalities were younger than those without, excluding an age effect. No differences in BMI, in adipose tissue repartition (particularly no differences in subcutaneous thigh development evaluated by TC/BMI) and in the frequency of diabetes or hypertension were observed. The severity of the metabolic phenotype in our 10 patients with laminopathy was heterogeneous; nevertheless triglycerides and ALT were significantly increased and median age and age at diabetes diagnosis were significantly lower, when compared with patients without laminopathy, indicating a more severe phenotype. It must be underlined that none of the 10 patients presented the characteristic morphotype of the Dunnigan syndrome.

Our results imply that a significant proportion of the common MS should be considered as a laminopathy and not only the severe forms as previously described (25). It thus extends the indications for screening for lamin A-related defect in diabetes or MS even in patients without major lipodystrophy. One of the 10 patients presented a dilated cardiomyopathy and another one ventricular arrhythmia underlining the importance of this screening linked to the potential cardiac rhythm abnormalities and sudden death that might be associated with laminopathies (28–30).

In conclusion, laminopathies are frequent in patients with MS. Screening for genetic mutations in the A-type lamins and its partners can be recommended in these patients even without specific clinical signs of laminopathy.

## MATERIALS AND METHODS

### Patients' characteristics

A total of 100 consecutive patients attending the Department of Endocrinology of North Hospital, Marseille, for obesity (50%), diabetes (40%) or thyroid disorders (10%) and presenting the MS according to the 2005 revised ATPIII definition (31) were included between February 2006 and September 2009. The anthropometrical and clinical data of the population are shown in Table 1. Out of the 100 patients, two were siblings. Sex ratio was two out of three (M/F). Written informed consent was obtained from all participants and the study was approved by the local Ethics Committee.

### Cell studies

*IF microscopy.* Blood samples were used to establish Epstein Barr Virus-immortalized lymphoblastoid cell lines. Fibroblasts were obtained from a skin biopsy. All analyses were performed at passage 2 for fibroblasts. Lymphoblastoid cells or fibroblasts from two non-obese, non-diabetic individuals were used as controls (aged 42 and 36, respectively).

We used an IF protocol described elsewhere (32). Primary antibodies list is available on request. The association of the two following criteria was considered to characterize an abnormal phenotype: (i) a percentage of dysmorphic nuclei up to 20% and (ii) an abnormal lamin A/C staining in the dysmorphic nuclei. These two criteria were chosen according to previously published data (25,33). A mean of 500 nuclei were analyzed for prelamin A staining and 200 nuclei for all other staining. IF was performed first on lymphoblastoid cells. Then, abnormal cellular phenotypes were confirmed, when available, on skin fibroblasts.

*Western blotting.* Protein extractions from cultured fibroblasts and nuclear matrix protein separation from EBV-immortalized lymphoblastoid cells were performed as previously described (24,34). Primary antibodies are available on request. We used WesternDot™ 625 Western Blot kit (Molecular Probes, Eugene, USA), according to manufacturer's protocol, and BioSpectrum 500 imager (UVP, LLC Upland, CA) for detection. Protein expression studies were performed by densitometric analyses using LabImage 1D 2006 software. For patient 23, IR-Dye 700 and IR-Dye 800 conjugated anti-mouse and anti-goat antibodies were used and detected on an Odyssey Infrared Imaging System (LiCor Biosciences, Lincoln, NE).

*Prelamin A processing study.* Prelamin A processing was studied on fibroblasts at passage 5 using the 'Prelamin A Processing Cell-Free System Immunoassay' (Diatheva, Fano, Italy) following manufacturer's protocol. Two protein concentrations (2 and 4 µg/well) were used for each patients (patient 23 and ZMPSTE24-deficient RD patient) and control. Each point was tested in triplicate and data were confirmed in two independent experiments.

### Molecular studies

DNA and total RNA was extracted from lymphoblastoid cell lines obtained for each patient, on the MagnaPure (Roche)

following the manufacturer's instructions. Real-time quantitative PCR assays for LMNA/C transcripts were performed on a Taq Man 7500 (Applied Biosystems) and direct sequencing for *LMNA*, *ZMPSTE24*, *ICMT*, *FNTA* and *FNTB* on the 3130XL sequencing (Applied Biosystems). Primers and probes are available on request. We compared expression levels of lamin A and lamin C transcripts with 2 probes: one located in a lamin A specific region (exon 11–12), the other in exon 2–3, targeting both lamin A and lamin C transcripts. qPCR was done in triplicates and two sets of experiments were performed.

### Statistical analyses

The main clinical and metabolic characteristics of individuals with and without nuclear abnormalities were compared using the Fischer exact test for qualitative variables and the Mann–Whitney test for quantitative variables. It is unlikely that these methods, known to be valid for unrelated observations, could be influenced by the presence of one pair of relatives.

## SUPPLEMENTARY MATERIAL

Supplementary Material is available at *HMG* online.

## ACKNOWLEDGEMENTS

The authors would like to thank the patients for participating in the study, Cécile Mouradian and Karine Bertaux from the CRB La Timone, Anissa Messaoudène, Christine Guieu, Joëlle Fiteni, Corinne Derrien and Nathalie Boitano from the Laboratoire de Biologie Cellulaire and Monique Verdier from INSERM UMR\_S926 for technical support.

*Conflict of Interest statement.* None declared.

## FUNDING

This work was supported by a PHRC 2005 grant (Programme Hospitalier de Recherche Clinique).

## REFERENCES

- Eckel, R.H., Grundy, S.M. and Zimmet, P.Z. (2005) The metabolic syndrome. *Lancet*, **365**, 1415–1428.
- Grundy, S.M. (2008) Metabolic syndrome pandemic. *Arterioscler. Thromb. Vasc. Biol.*, **28**, 629–636.
- Vantghem, M.C., Pigny, P., Maurage, C.A., Rouaix-Emery, N., Stojkovic, T., Cuisset, J.M., Millaire, A., Lascols, O., Vermersch, P., Wemeau, J.L. *et al.* (2004) Patients with familial partial lipodystrophy of the Dunnigan type due to a LMNA R482W mutation show muscular and cardiac abnormalities. *J. Clin. Endocrinol. Metab.*, **89**, 5337–5346.
- Navarro, C.L., Cau, P. and Levy, N. (2006) Molecular bases of progeroid syndromes. *Hum. Mol. Genet.*, **15** (Spec no. 2), R151–R161.
- Worman, H.J. and Bonne, G. (2007) 'Laminopathies': a wide spectrum of human diseases. *Exp. Cell Res.*, **313**, 2121–2133.
- Maraldi, N.M., Capanni, C., Cenni, V., Fini, M. and Lattanzi, G. (2011) Laminopathies and lamin-associated signaling pathways. *J. Cell Biochem.*, **112**, 979–992.

7. Agarwal, A.K., Fryns, J.P., Auchus, R.J. and Garg, A. (2003) Zinc metalloproteinase, ZMPSTE24, is mutated in mandibuloacral dysplasia. *Hum. Mol. Genet.*, **12**, 1995–2001.
8. Navarro, C.L., De Sandre-Giovannoli, A., Bernard, R., Boccaccio, I., Boyer, A., Genevieve, D., Hadj-Rabia, S., Gaudy-Marqueste, C., Smitt, H.S., Vabres, P. *et al.* (2004) Lamin A and ZMPSTE24 (FACE-1) defects cause nuclear disorganization and identify restrictive dermopathy as a lethal neonatal laminopathy. *Hum. Mol. Genet.*, **13**, 2493–2503.
9. Marino, G., Ugalde, A.P., Salvador-Montoliu, N., Varela, I., Quiros, P.M., Cadinanos, J., van der Pluijm, I., Freije, J.M. and López-Otin, C. (2008) Premature aging in mice activates a systemic metabolic response involving autophagy induction. *Hum. Mol. Genet.*, **17**, 2196–2211.
10. Duesing, K., Charpentier, G., Marre, M., Tichet, J., Hercberg, S., Froguel, P. and Gibson, F. (2008) Evaluating the association of common LMNA variants with type 2 diabetes and quantitative metabolic phenotypes in French Europeans. *Diabetologia*, **51**, 76–81.
11. Wegner, L., Andersen, G., Sparso, T., Grarup, N., Glumer, C., Borch-Johnsen, K., Jørgensen, T., Hansen, T. and Pedersen, O. (2007) Common variation in LMNA increases susceptibility to type 2 diabetes and associates with elevated fasting glycemia and estimates of body fat and height in the general population: studies of 7,495 Danish whites. *Diabetes*, **56**, 694–698.
12. Steinle, N.I., Kazlauskaitė, R., Imumorin, I.G., Hsueh, W.C., Pollin, T.I., O'Connell, J.R., Mitchell, B.D. and Shuldiner, A.R. (2004) Variation in the lamin A/C gene: associations with metabolic syndrome. *Arterioscler. Thromb. Vasc. Biol.*, **24**, 1708–1713.
13. Hegele, R.A., Cao, H., Harris, S.B., Zinman, B., Hanley, A.J. and Anderson, C.M. (2000) Genetic variation in LMNA modulates plasma leptin and indices of obesity in aboriginal Canadians. *Physiol. Genomics*, **3**, 39–44.
14. Liang, H., Murase, Y., Katuta, Y., Asano, A., Kobayashi, J. and Mabuchi, H. (2005) Association of LMNA 1908C/T polymorphism with cerebral vascular disease and diabetic nephropathy in Japanese men with type 2 diabetes. *Clin. Endocrinol. (Oxf)*, **63**, 317–322.
15. Murase, Y., Yagi, K., Katsuda, Y., Asano, A., Koizumi, J. and Mabuchi, H. (2002) An LMNA variant is associated with dyslipidemia and insulin resistance in the Japanese. *Metabolism*, **51**, 1017–1021.
16. Hegele, R.A., Huff, M.W. and Young, T.K. (2001) Common genomic variation in LMNA modulates indexes of obesity in Inuit. *J. Clin. Endocrinol. Metab.*, **86**, 2747–2751.
17. Weyer, C., Wolford, J.K., Hanson, R.L., Foley, J.E., Tataranni, P.A., Bogardus, C. and Pratley, R.E. (2001) Subcutaneous abdominal adipocyte size, a predictor of type 2 diabetes, is linked to chromosome 1q21–q23 and is associated with a common polymorphism in LMNA in Pima Indians. *Mol. Genet. Metab.*, **72**, 231–238.
18. Owen, K.R., Groves, C.J., Hanson, R.L., Knowler, W.C., Shuldiner, A.R., Elbein, S.C., Mitchell, B.D., Froguel, P., Ng, M.C., Chan, J.C. *et al.* (2007) Common variation in the LMNA gene (encoding lamin A/C) and type 2 diabetes: association analyses in 9,518 subjects. *Diabetes*, **56**, 879–883.
19. Mesa, J.L., Loos, R.J., Franks, P.W., Ong, K.K., Luan, J., O'Rahilly, S., Wareham, N.J., Barroso, I. *et al.* (2007) Lamin A/C polymorphisms, type 2 diabetes, and the metabolic syndrome: case-control and quantitative trait studies. *Diabetes*, **56**, 884–889.
20. Wolford, J.K., Hanson, R.L., Bogardus, C. and Prochazka, M. (2001) Analysis of the lamin A/C gene as a candidate for type II diabetes susceptibility in Pima Indians. *Diabetologia*, **44**, 779–782.
21. Fontaine-Bisson, B., Alessi, M.C., Saut, N., Fumeron, F., Marre, M., Dutour, A., Badens, C., Levy, N., Tichet, J., Juhan-Vague, I. *et al.* (2010) Polymorphisms of the lamina maturation pathway and their association with the metabolic syndrome: the DESIR prospective study. *J. Mol. Med.*, **88**, 193–201.
22. Capell, B.C. and Collins, F.S. (2006) Human laminopathies: nuclei gone genetically awry. *Nat. Rev. Genet.*, **7**, 940–952.
23. Stewart, C.L., Roux, K.J. and Burke, B. (2007) Blurring the boundary: the nuclear envelope extends its reach. *Science*, **318**, 1408–1412.
24. Navarro, C.L., Cadinanos, J., De Sandre-Giovannoli, A., Bernard, R., Courier, S., Boccaccio, I., Boyer, A., Kleijer, W.J., Wagner, A., Giuliano, F. *et al.* (2005) Loss of ZMPSTE24 (FACE-1) causes autosomal recessive restrictive dermopathy and accumulation of Lamin A precursors. *Hum. Mol. Genet.*, **14**, 1503–1513.
25. Decaudoain, A., Vantyghem, M.C., Guerci, B., Hecart, A.C., Auclair, M., Reznik, Y., Narbonne, H., Ducluzeau, P.H., Donadille, B., Lebbé, C. *et al.* (2007) New metabolic phenotypes in laminopathies: LMNA mutations in patients with severe metabolic syndrome. *J. Clin. Endocrinol. Metab.*, **92**, 4835–4844.
26. Markiewicz, E., Venables, R., Mauricio-Alvarez, R., Quinlan, R., Dorobek, M., Hausmanowa-Petruciewicz, I. and Hutchison, C. (2002) Increased solubility of lamins and redistribution of lamin C in X-linked Emery–Dreifuss muscular dystrophy fibroblasts. *J. Struct. Biol.*, **140**, 241–253.
27. Zhang, Q., Bethmann, C., Worth, N.F., Davies, J.D., Wasner, C., Feuer, A., Ragnauth, C.D., Yi, Q., Mellad, J.A., Warren, D.T. *et al.* (2007) Nesprin-1 and -2 are involved in the pathogenesis of Emery Dreifuss muscular dystrophy and are critical for nuclear envelope integrity. *Hum. Mol. Genet.*, **16**, 2816–2833.
28. Pan, H., Richards, A.A., Zhu, X., Joglar, J.A., Yin, H.L. and Garg, V. (2009) A novel mutation in LAMIN A/C is associated with isolated early-onset atrial fibrillation and progressive atrioventricular block followed by cardiomyopathy and sudden cardiac death. *Heart Rhythm*, **6**, 707–710.
29. Ehlermann, P., Lehrke, S., Papavassiliu, T., Meder, B., Borggrefe, M., Katus, H.A. and Schimpf, R. (2011) Sudden cardiac death in a patient with lamin A/C mutation in the absence of dilated cardiomyopathy or conduction disease. *Clin. Res. Cardiol.*, **100**, 547–551.
30. Marsman, R.F., Bardai, A., Postma, A.V., Res, J.C., Koopmann, T.T., Beekman, L., van der Wal, A.C., Pinto, Y.M., Lekanne-Deprez, R.H. *et al.* (2011) A complex double deletion in LMNA underlies progressive cardiac conduction disease, atrial arrhythmias and sudden death. *Circ. Cardiovasc. Genet.*, **4**, 280–287.
31. Grundy, S.M., Cleeman, J.I., Daniels, S.R., Donato, K.A., Eckel, R.H., Franklin, B.A., Gordon, D.J., Krauss, R.M., Savage, P.J., Smith, S.C. Jr. *et al.* (2005) Diagnosis and management of the metabolic syndrome: an American Heart Association/National Heart, Lung, and Blood Institute Scientific Statement. *Circulation*, **112**, 2735–2752.
32. Gaudy-Marqueste, C., Roll, P., Esteves-Vieira, V., Weiller, P.J., Grob, J.J., Cau, P., Lévy, N. and De Sandre-Giovannoli, A. (2010) LBR mutation and nuclear envelope defects in a patient affected with Reynolds syndrome. *J. Med. Genet.*, **47**, 361–370.
33. Scaffidi, P., Gordon, L. and Misteli, T. (2005) The cell nucleus and aging: tantalizing clues and hopeful promises. *PLoS Biol.*, **3**, e395.
34. Estanol, J.M., Agell, N. and Bachs, O. (1997) Nuclear protein patterns in normal T-lymphocytes and lymphoblastoid cells. *Cancer Res.*, **57**, 55–61.
